# Supplementary material for: Vaccination against Bm86 Homologues in Rabbits Does Not Impair Ixodes ricinus Feeding or Oviposition
Source: PubMed Central journal article supplement (PMC4412674; doi:10.1371/journal.pone.0123495), 2015-04-28
Supplement: pone.0123495.s001.pdf [file pone.0123495.s001.pdf]

**Experiment A. Tickweights (in mg)**

| <b>Tick</b> | <b>rlr86-1</b> | <b>rlr86-2</b> | <b>rlr86 combination</b> | <b>Ovalbumin</b> |
|-------------|----------------|----------------|--------------------------|------------------|
| 1           | 185            | 221            | 60                       | 249              |
| 2           | 317            | 312            | 50                       | 213              |
| 3           | 248            | 49             | 59                       | 148              |
| 4           | 253            | 35             | 50                       | 221              |
| 5           | 204            | 307            | 58                       | 41               |
| 6           | 244            | 324            | 223                      | 219              |
| 7           | 245            | 43             | 218                      | 240              |
| 8           | 196            | 94             | 292                      | 293              |
| 9           | 232            | 244            | 208                      | 104              |
| 10          | 289            | 270            | 283                      | 148              |
| 11          | 233            | 45             | 231                      | 299              |
| 12          | 297            | 179            | 257                      | 43               |
| 13          | 274            | 204            | 55                       | 76               |
| 14          | 311            | 196            | 59                       | 239              |
| 15          | 293            | 372            | 69                       | 90               |
| 16          | 223            | 292            | 207                      | 245              |
| 17          | 280            | 271            | 55                       | 213              |
| 18          | 275            | 164            | 64                       | 190              |
| 19          | 214            | 287            | 218                      | 236              |
| 20          | 220            | 214            | 237                      | 251              |
| 21          | 239            | 228            | 229                      | 230              |
| 22          | 192            | 126            | 180                      | 309              |
| 23          | 245            | 265            | 190                      | 299              |
| 24          | 295            | 266            | 142                      | 352              |
| 25          | 202            | 274            | 223                      | 237              |
| 26          | 291            | 298            | 26                       | 249              |
| 27          | 246            | 132            | 32                       | 343              |
| 28          | 201            | 154            | 41                       | 329              |
| 29          | 216            | 236            | 261                      | 296              |
| 30          | 288            | 302            | 216                      | 276              |
| 31          | 260            | 295            | 62                       | 300              |
| 32          | 216            |                | 232                      | 248              |
| 33          | 210            |                | 254                      | 283              |
| 34          | 122            |                | 204                      | 278              |
| 35          | 256            |                | 238                      | 266              |
| 36          | 149            |                | 144                      | 355              |
| 37          | 266            |                | 151                      | 222              |
| 38          | 263            |                | 279                      | 275              |
| 39          |                |                |                          | 126              |
| 40          |                |                |                          | 298              |
| 41          |                |                |                          | 48               |
| 42          |                |                |                          | 179              |

Experiment A. Eggmass (in mg)

| Tick | rlr86-1 | rlr86-2 | rlr86 combination | Ovalbumin |
|------|---------|---------|-------------------|-----------|
| 1    | 90      | 107     | 26                | 137       |
| 2    | 149     | 107     | 5                 | 100       |
| 3    | 118     | 23      | 34                | 60        |
| 4    | 111     | 29      | 15                | 108       |
| 5    | 103     | 13      | 24                | 12        |
| 6    | 97      | 112     | 109               | 78        |
| 7    | 0       | 150     | 110               | 125       |
| 8    | 74      | 0       | 146               | 134       |
| 9    | 44      | 0       | 112               | 19        |
| 10   | 0       | 99      | 70                | 76        |
| 11   | 129     | 77      | 122               | 67        |
| 12   | 121     | 23      | 149               | 23        |
| 13   | 113     | 104     | 6                 | 44        |
| 14   | 120     | 83      | 10                | 72        |
| 15   | 148     | 78      | 27                | 39        |
| 16   | 108     | 98      | 67                | 123       |
| 17   | 124     | 106     | 20                | 99        |
| 18   | 126     | 134     | 10                | 101       |
| 19   | 125     | 74      | 104               | 55        |
| 20   | 100     | 83      | 111               | 134       |
| 21   | 110     | 100     | 88                | 95        |
| 22   | 91      | 132     | 48                | 67        |
| 23   | 126     | 75      | 0                 | 132       |
| 24   | 160     | 100     | 0                 | 90        |
| 25   | 40      | 71      | 82                | 100       |
| 26   | 38      | 72      | 0                 | 68        |
| 27   | 0       | 125     | 0                 | 66        |
| 28   | 84      | 19      | 0                 | 26        |
| 29   | 71      | 47      | 0                 | 114       |
| 30   | 80      | 88      | 41                | 75        |
| 31   | 123     | 45      | 23                | 133       |
| 32   | 24      |         | 77                | 92        |
| 33   | 34      |         | 0                 | 110       |
| 34   | 23      |         | 99                | 95        |
| 35   | 68      |         | 103               | 110       |
| 36   | 0       |         | 67                | 140       |
| 37   | 0       |         | 56                | 112       |
| 38   | 81      |         | 87                | 87        |
| 39   |         |         |                   | 39        |
| 40   |         |         |                   | 102       |
| 41   |         |         |                   | 7         |
| 42   |         |         |                   | 90        |

**Experiment B. Tickweights (in mg)**

| <b>Tick</b> | <b>Animal A</b> | <b>Animal B</b> | <b>Animal C</b> | <b>Ovalbumin</b> |
|-------------|-----------------|-----------------|-----------------|------------------|
| 1           | 308             | 332             | 384             | 349              |
| 2           | 410             | 416             | 148             | 433              |
| 3           | 312             | 376             | 352             | 271              |
| 4           | 293             | 441             | 347             | 323              |
| 5           | 371             | 325             | 376             | 338              |
| 6           | 290             | 320             | 455             | 267              |
| 7           | 334             | 236             | 366             | 270              |
| 8           | 431             | 330             | 344             | 383              |
| 9           | 437             | 355             | 289             | 334              |
| 10          | 311             | 380             | 243             | 207              |
| 11          | 348             | 331             | 386             | 341              |
| 12          | 329             | 444             | 328             | 469              |
| 13          | 347             | 372             | 407             | 417              |
| 14          | 324             | 379             | 362             | 293              |
| 15          | 403             | 324             | 354             | 396              |
| 16          | 367             | 286             | 60              | 133              |
| 17          | 275             | 311             | 14              | 400              |
| 18          | 302             | 366             | 425             | 135              |
| 19          | 320             | 505             | 393             | 422              |
| 20          | 403             | 351             | 186             | 363              |
| 21          | 453             | 181             | 347             | 331              |
| 22          | 350             | 398             | 402             | 282              |
| 23          | 285             | 339             | 434             | 277              |
| 24          | 152             | 383             | 323             | 249              |
| 25          | 344             | 309             | 220             | 147              |
| 26          | 346             | 420             | 420             | 337              |
| 27          | 364             | 279             | 277             | 377              |
| 28          | 293             | 295             | 449             | 215              |
| 29          | 344             | 206             | 235             | 228              |
| 30          | 303             | 173             | 317             | 213              |
| 31          | 416             | 333             | 224             | 345              |
| 32          | 213             | 187             | 242             | 275              |
| 33          |                 | 377             | 143             | 126              |
| 34          |                 | 134             |                 | 298              |
| 35          |                 | 255             |                 |                  |
| 36          |                 | 249             |                 |                  |
| 37          |                 | 326             |                 |                  |
| 38          |                 | 205             |                 |                  |

**Experiment B. Eggmass (in mg)**

| <b>Tick</b> | <b>Animal A</b> | <b>Animal B</b> | <b>Animal C</b> | <b>Ovalbumin</b> |
|-------------|-----------------|-----------------|-----------------|------------------|
| 1           | 119             | 160             | 152             | 98               |
| 2           | 149             | 176             | 67              | 203              |
| 3           | 135             | 171             | 167             | 115              |
| 4           | 119             | 208             | 0               | 131              |
| 5           | 113             | 147             | 169             | 61               |
| 6           | 129             | 146             | 204             | 114              |
| 7           | 133             | 77              | 156             | 0                |
| 8           | 183             | 105             | 84              | 180              |
| 9           | 213             | 170             | 171             | 152              |
| 10          | 131             | 167             | 129             | 75               |
| 11          | 132             | 147             | 18              | 125              |
| 12          | 138             | 168             | 165             | 242              |
| 13          | 146             | 160             | 157             | 194              |
| 14          | 151             | 181             | 200             | 0                |
| 15          | 191             | 143             | 160             | 172              |
| 16          | 164             | 138             | 139             | 0                |
| 17          | 95              | 138             | 0               | 0                |
| 18          | 121             | 119             | 0               | 30               |
| 19          | 128             | 232             | 220             | 180              |
| 20          | 190             | 61              | 0               | 159              |
| 21          | 152             | 35              | 0               | 121              |
| 22          | 156             | 138             | 168             | 0                |
| 23          | 134             | 118             | 188             | 105              |
| 24          | 23              | 179             | 197             | 65               |
| 25          | 87              | 158             | 124             | 0                |
| 26          | 127             | 81              | 70              | 100              |
| 27          | 144             | 110             | 135             | 61               |
| 28          | 0               | 51              | 79              | 143              |
| 29          | 113             | 140             | 60              | 0                |
| 30          | 4               | 0               | 57              | 53               |
| 31          | 71              | 87              | 98              | 0                |
| 32          | 98              | 71              | 65              | 79               |
| 33          |                 | 0               | 0               | 88               |
| 34          |                 | 59              |                 | 71               |
| 35          |                 | 54              |                 |                  |
| 36          |                 | 0               |                 |                  |
| 37          |                 | 0               |                 |                  |
| 38          |                 | 41              |                 |                  |
